# Supplementary material for: Yersinia pestis Antigen F1 but Not LcrV Induced Humoral and Cellular Immune Responses in Humans Immunized with Live Plague Vaccine—Comparison of Immunoinformatic and Immunological Approaches
Source: Vaccines (Basel). 2020 Nov 19;8(4):698. doi: 10.3390/vaccines8040698 (PMC7712656; doi:10.3390/vaccines8040698)
Supplement: Supplementary file 1 [file vaccines-08-00698-s001.pdf]

**F1**

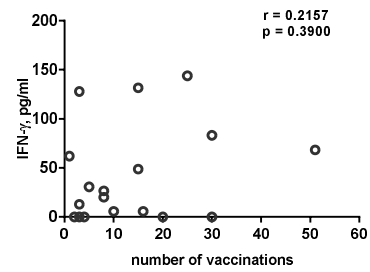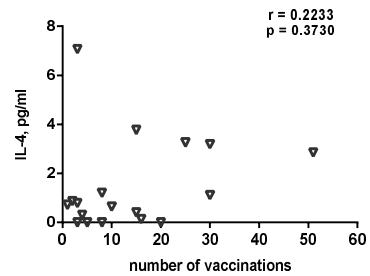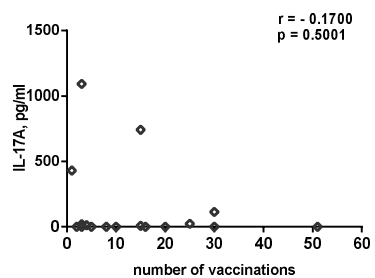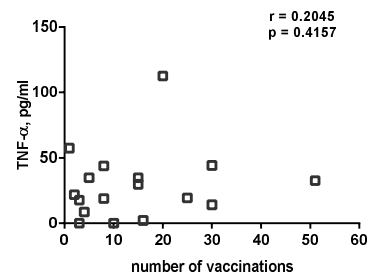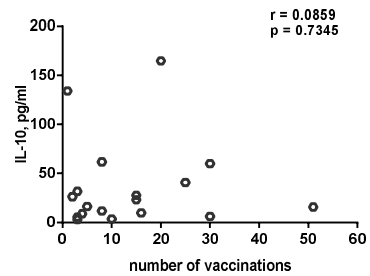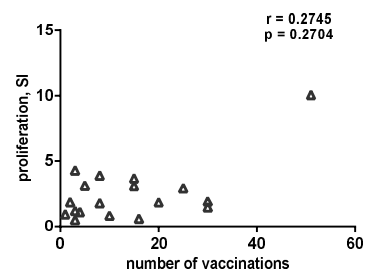

**LcrV**

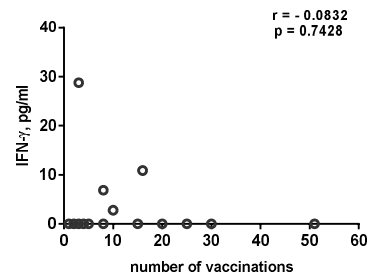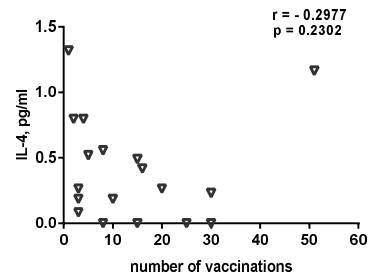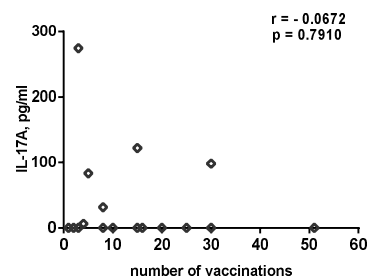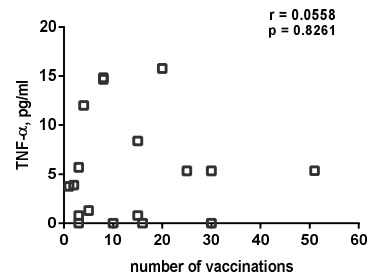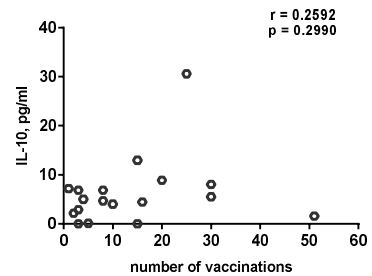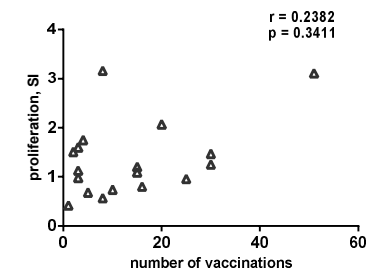

**Figure S1.** Analysis of association between either cytokine secretion or proliferative response and a number of vaccinations with the LPV. PBMCs from immunized donors (n=18) were stimulated with recombinant F1 or LcrV (both at 5  $\mu$ g/ml), and supernatants were analyzed for IFN- $\gamma$ , TNF- $\alpha$ , IL-4, IL-10, and IL-17A levels. The correlation was estimated using Spearman's Rank Correlation coefficient. The Stimulation index (SI) was calculated against unstimulated cells. No correlation was revealed for all tested cytokines, as well as between proliferation (SI) and post-immunization time ( $p>0.05$ ).

F1

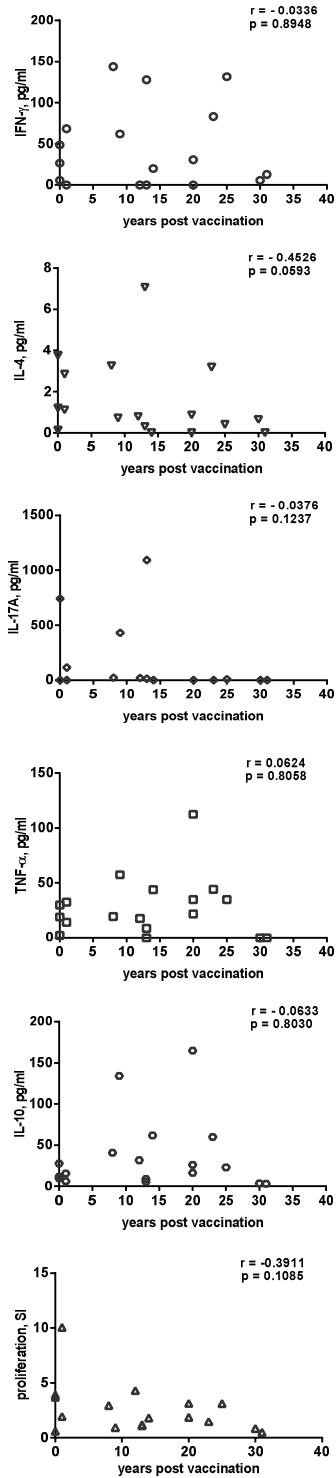

LcrV

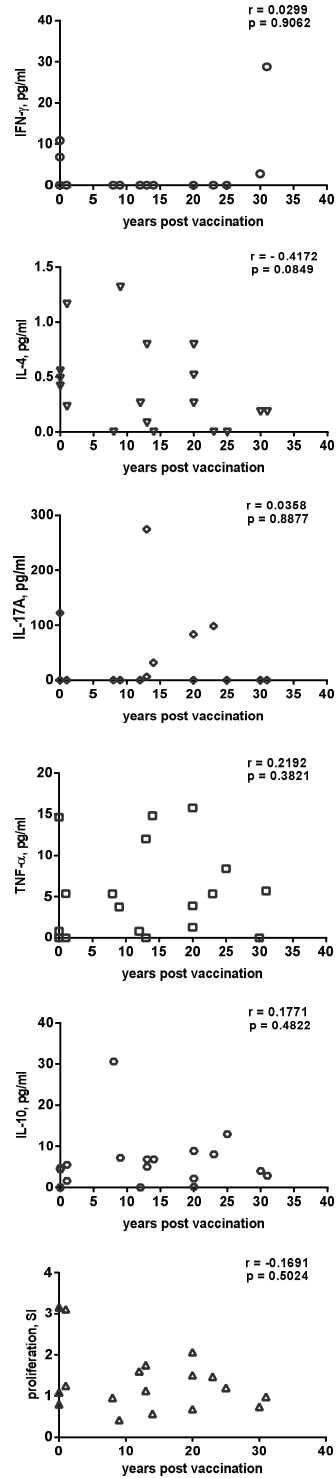

**Figure S2.** Analysis of association between cytokine secretion or proliferation and post vaccination time in years. PBMCs from immunized donors (n=18) were stimulated with recombinant F1 or LcrV (both at 5  $\mu$ g/ml), and supernatants were analyzed for IFN- $\gamma$ , TNF- $\alpha$ , IL-4, IL-10, and IL-17A levels. The correlation was calculated with Spearman's Rank Correlation coefficient. The SI was calculated against unstimulated cells. No correlation was revealed for all tested cytokines, as well as between proliferation (SI) and post-immunization time ( $p > 0.05$ ).

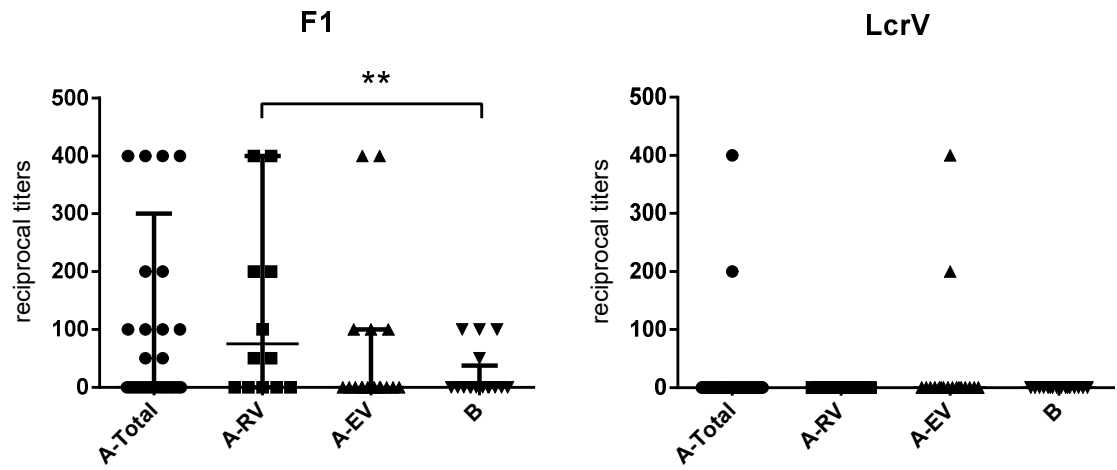

**Figure S3.** Serum antibody titers to F1 and LcrV antigens revealed by ELISA in sera obtained from vaccinees (groups A-Total, A-RV, A-EV) and naïve donors (group B). Difference between groups was analyzed by Mann-Whitney test; \*\* $p < 0.01$ .

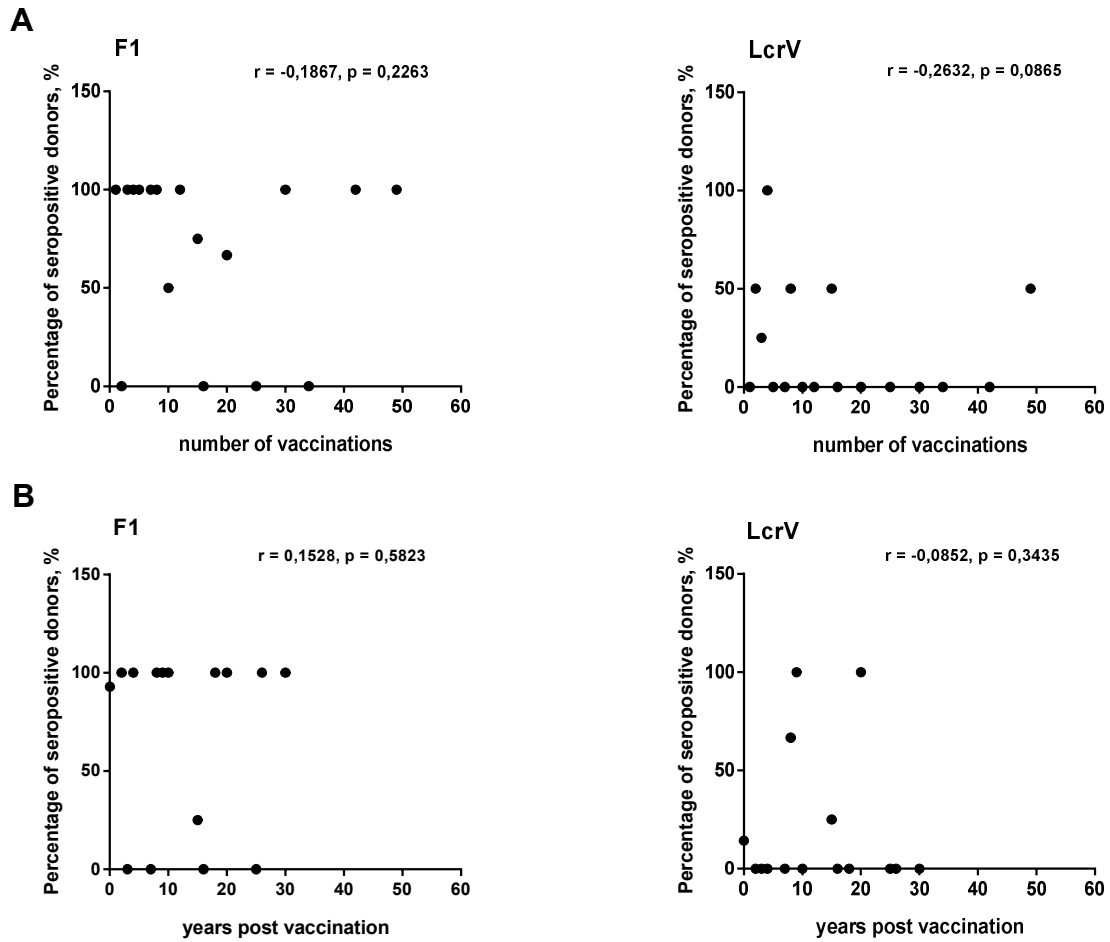

**Figure S4.** Analysis of correlations between percent of positive antisera revealed by immunoblot technique to either F1 or LcrV antigens: (a) number of vaccinations with LPV; (b) post vaccination time. Spearman's Rank Correlation Coefficient and p-value were calculated. No significant correlations were detected in all cases.

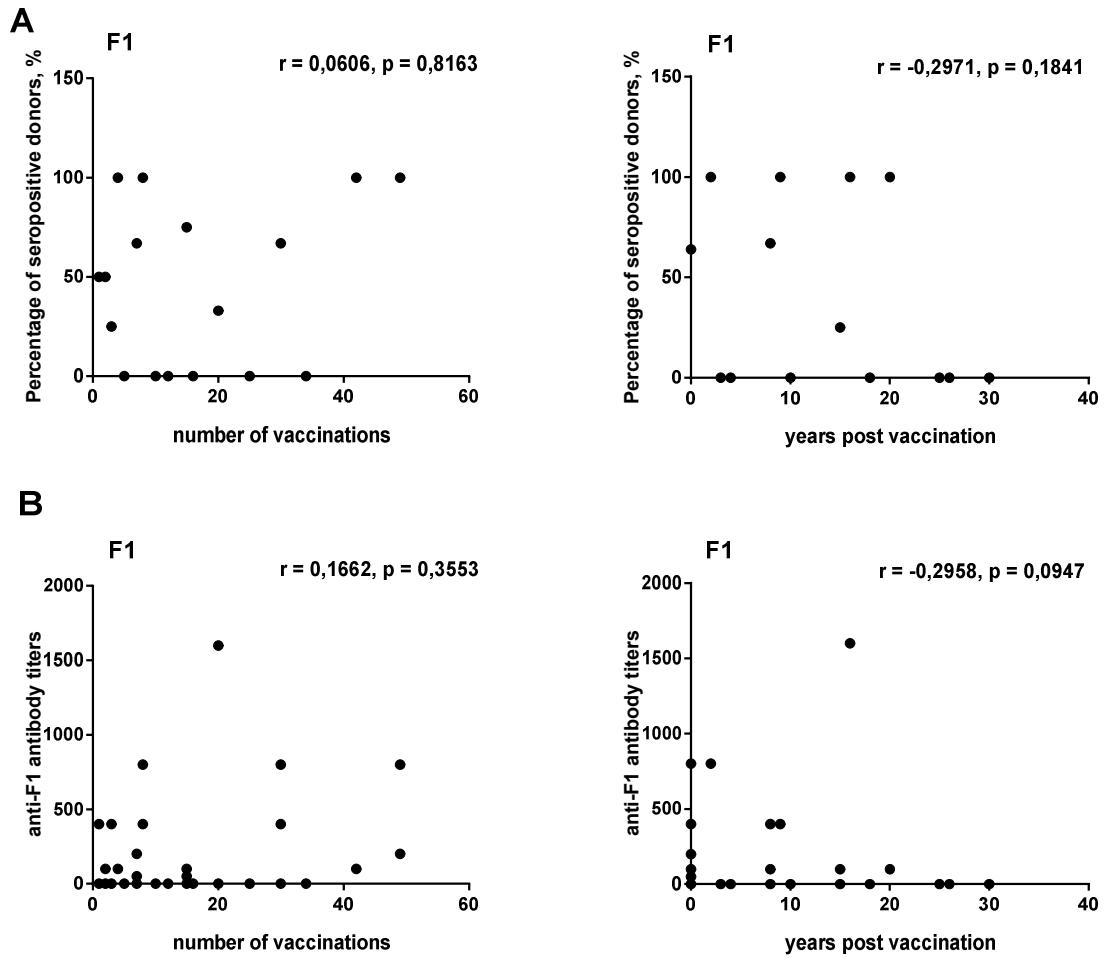

**Figure S5.** Analysis of correlations between number of vaccinations with LPV or post vaccination time: (a) percent of positive antisera to F1 revealed by ELISA; (b) anti-F1 antibody titers. Spearman's Rank Correlation Coefficient and p-value were calculated. No significant correlations were detected in all cases.

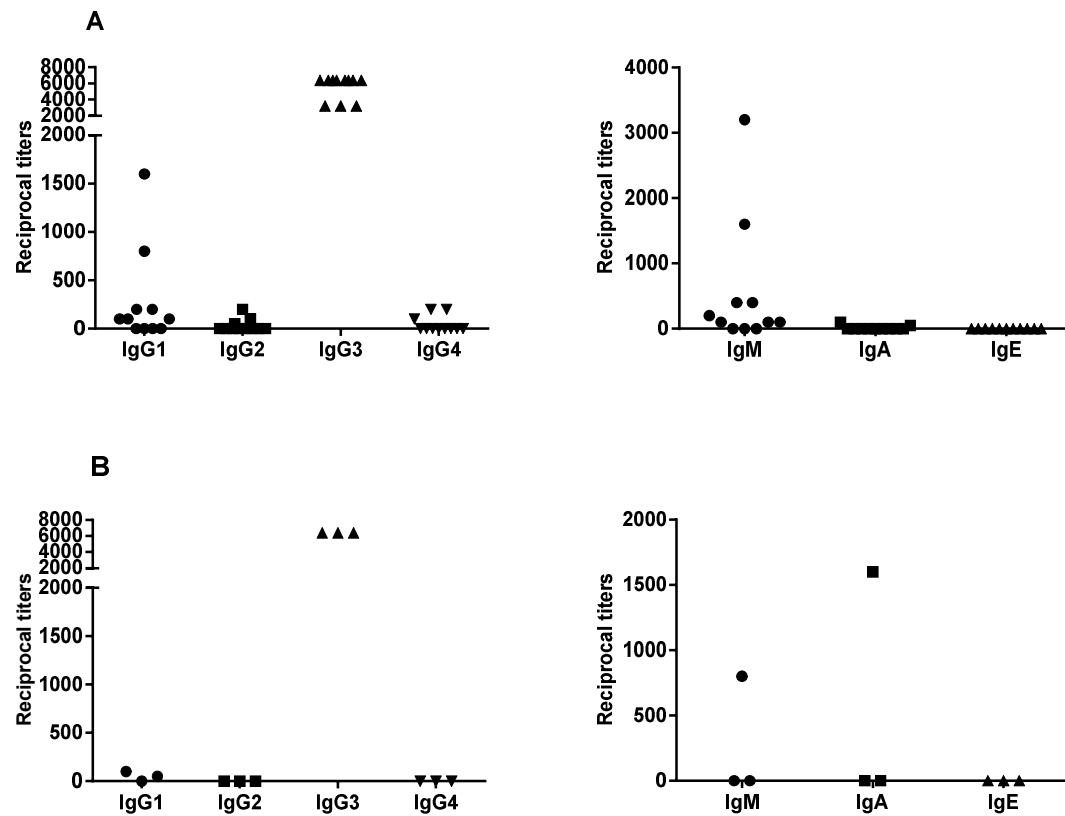

**Figure S6.** Distribution of classes and subclasses of anti-F1 immunoglobulins in vaccinees (A) and unvaccinated donors (B) detected in ELISA. Sera from 11 of F1-seropositive vaccinated and 3 unvaccinated donors were used for analysis.

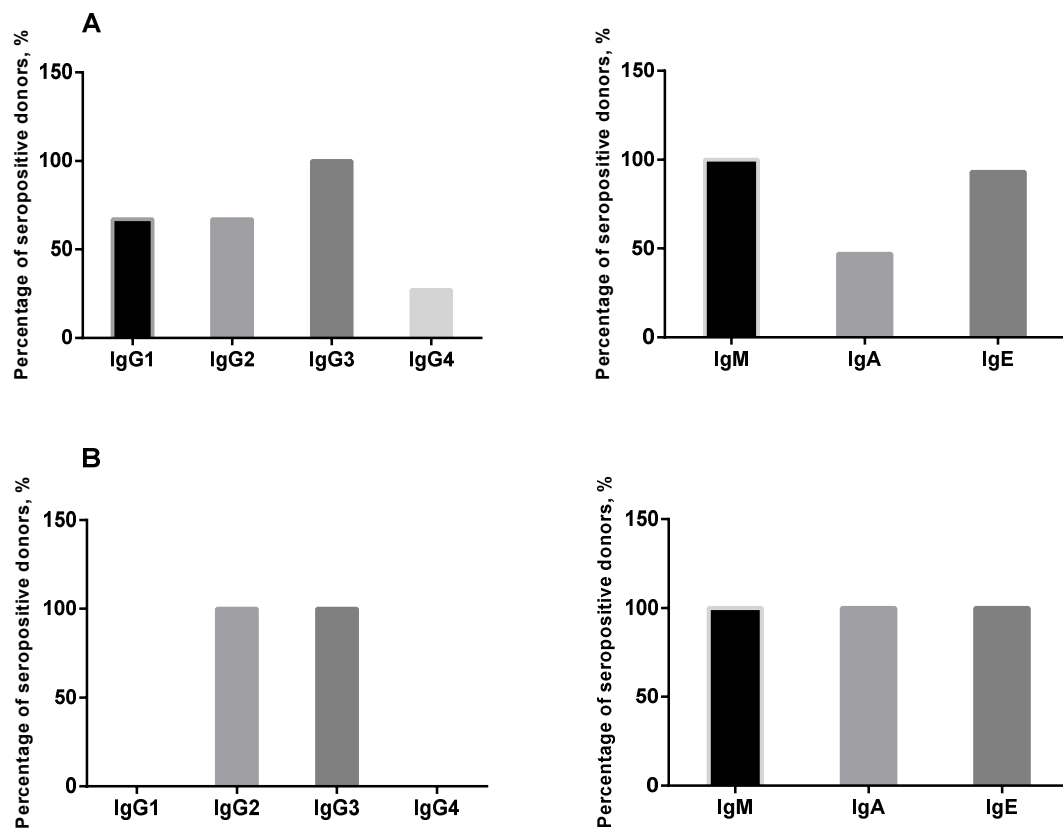

**Figure S7.** Distribution of classes and subclasses of anti-F1 immunoglobulins in vaccinees (A) and unvaccinated donors (B) detected by immunoblotting technique. Sera from 15 of F1-seropositive vaccinated donors and 1 unvaccinated donor were used for analysis.

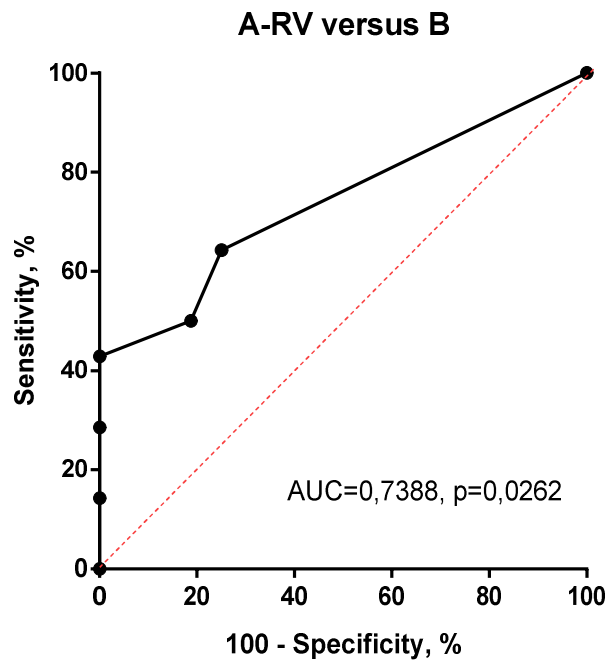

| Area under the curve |        |                    |         | Criterion values in dependence on the cutoff value |                |                  |                |                 |                |
|----------------------|--------|--------------------|---------|----------------------------------------------------|----------------|------------------|----------------|-----------------|----------------|
| AUC                  | SE     | 95% CI             | p value | Cutoff                                             | Sensitivity, % | 95% CI           | Specificity, % | 95% CI          | Youden's index |
| 0,7388               | 0,0947 | 0,5532 -<br>0,9245 | 0,0262  | > 25.00                                            | 64,29          | 35,14-<br>87,24  | 75,00          | 47,62-<br>92,73 | 39,29          |
|                      |        |                    |         | > 75.00                                            | 50,00          | 23,04-<br>76,96  | 81,25          | 54,35-<br>95,95 | 31,25          |
|                      |        |                    |         | > 150.0                                            | 42,86          | 17,66-<br>71,14  | 100,0          | 79,41-<br>100,0 | 42,86          |
|                      |        |                    |         | > 300.0                                            | 28,57          | 8,389 -<br>58,10 | 100,0          | 79,41-<br>100,0 | 28,57          |
|                      |        |                    |         | > 600.0                                            | 14,29          | 1,779-<br>42,81  | 100,0          | 79,41-<br>100,0 | 14,29          |

**Figure S8.** Receiver operating characteristic (ROC) analysis for anti-F1 serum antibody titers in group A-RV versus group B. ROC curve showed AUC=0,7388±0,09469 with p<0.05 indicating that anti-F1 antibody titers could discriminate recently vaccinated donors from unvaccinated controls. However, the maximum Youden's index was only 42,86 in case of cutoff = 150 with absolute specificity (100%), but low sensitivity (42,86%). AUC: area under the curve; SE: standard error; CI: confidence interval.

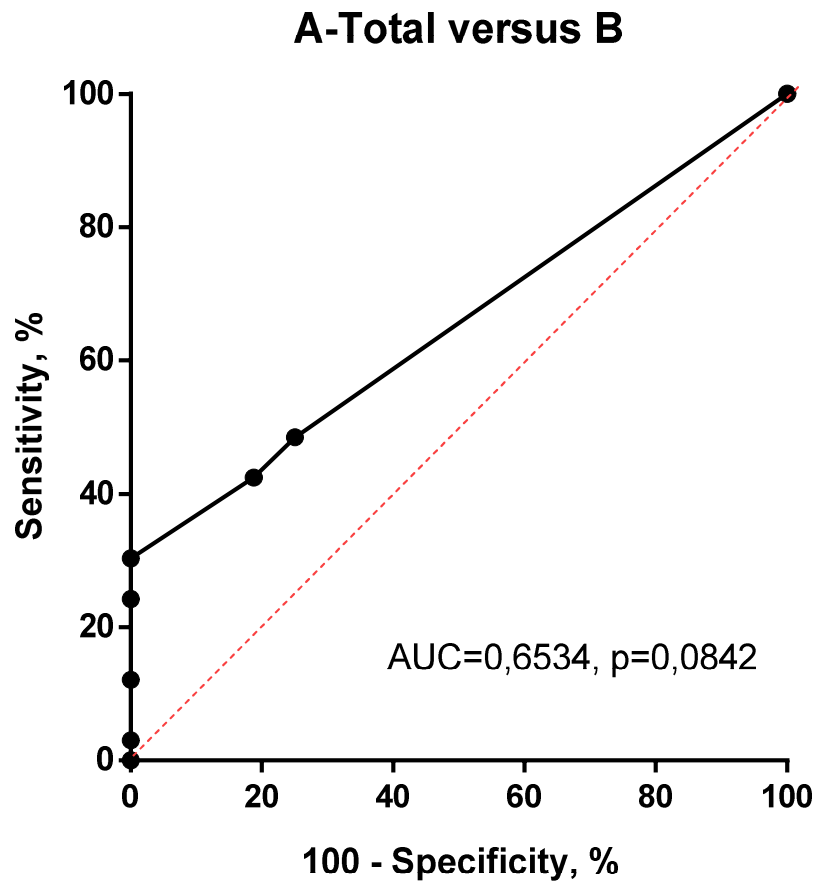

**Figure S9.** Receiver operating characteristic (ROC) analysis for anti-F1 serum antibody titers in group A-Total versus group B. In this case, anti-F1 antibody titers were not discriminating between all donors who ever have been received vaccination with the LPV and naïve control volunteers without LPV immunization ( $p>0.05$ ). AUC: area under the curve.

A

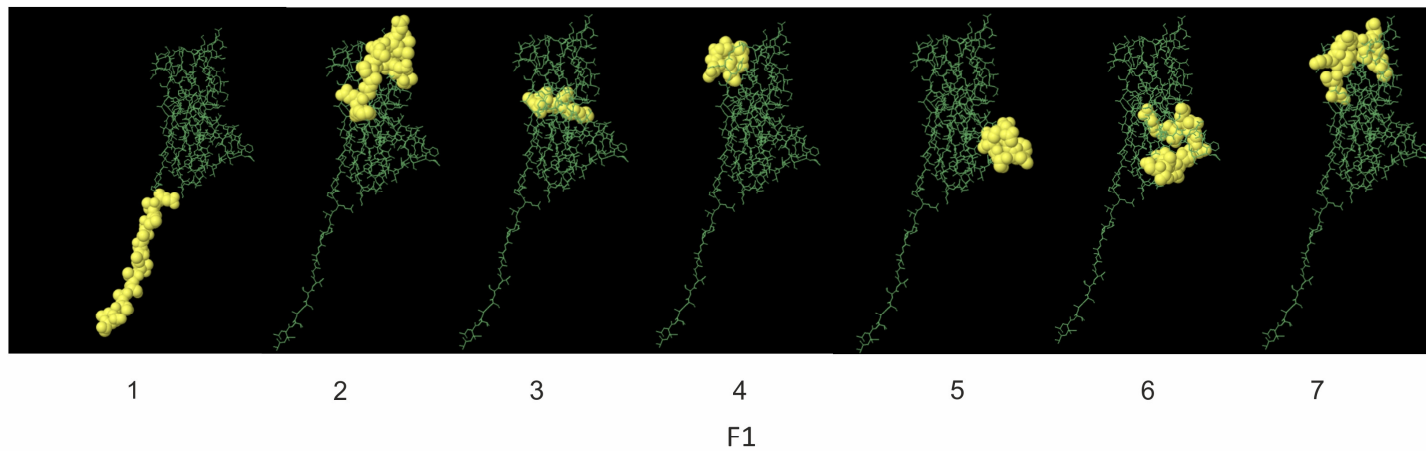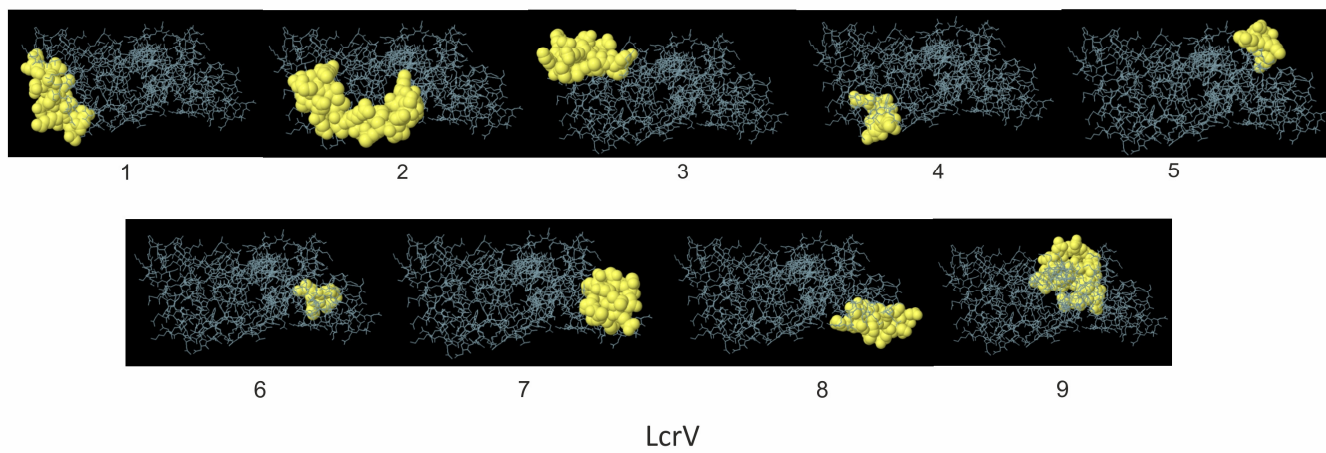

**B**

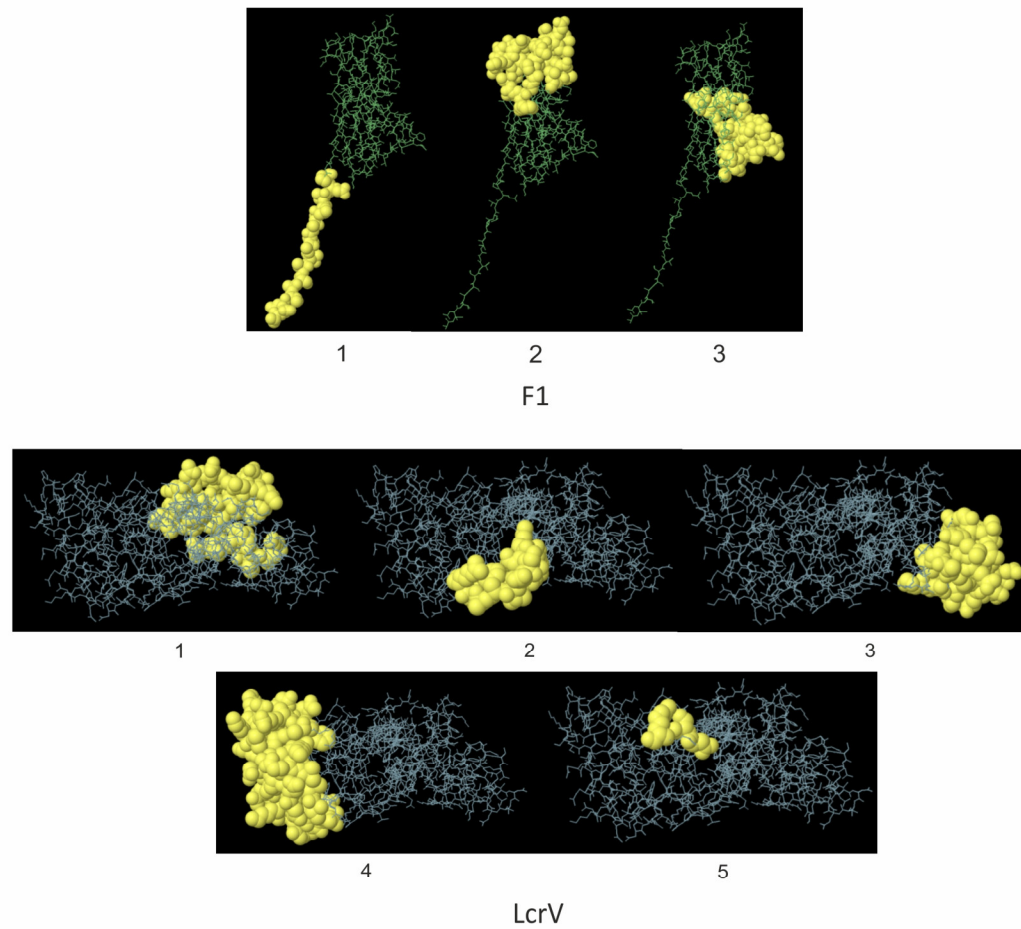

**Figure S10.** Structural 3D ribbon diagrams modeling of F1 and LcrV proteins based on the relevant original amino acid sequences. (A) B-cell linear epitopes residues of the F1 and LcrV. (B) B-cell conformational epitopes residues of the F1 and LcrV.

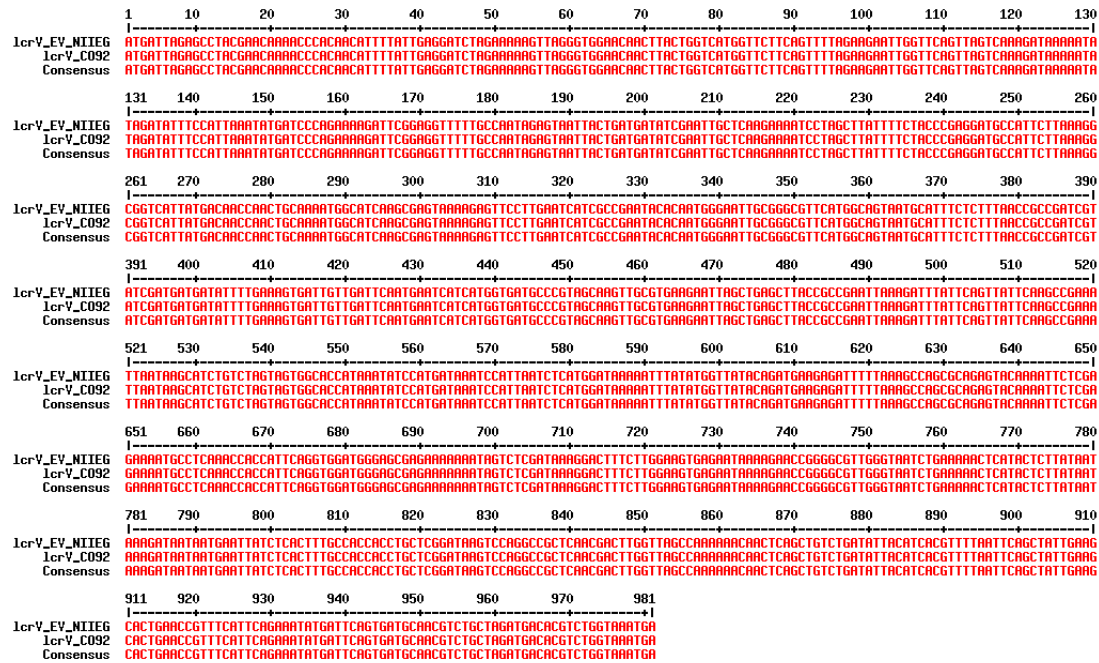

**Figure S11.** Alignments of the nucleotide sequences of *lcrV* gene from: (A) the *Y. pestis* CO92 (Acc. No. in NCBI AL117189.1) and (B) the commercial strain of the *Y. pestis* EV line NIIIEG (Acc. No. in NCBI MT952719).

**S1 Table.** Library of 27 overlapping 17-mer synthetic peptides designed based on 170 amino acid sequence of the F1 protein from *Y. pestis* CO92 (GenBank accession No. NP\_395430.1). The peptides were made with >95% purity (GenScript, Piscataway, NJ) and stored in aliquots (stock concentration of 10 mg/ml) at -80°C.

| Peptide ID             | Peptide length | Sequence           |
|------------------------|----------------|--------------------|
| 1. F1_1-17<br>(signal) | 17             | MKKISSVIAIALFGTIA  |
| 2. F1_7-24<br>(signal) | 17             | VIAIALFGTIATANAAD  |
| 3. F1_13-29            | 17             | FGTIATANAADLTASTT  |
| 4. F1_19-35            | 17             | ANAADLTASTTATATLV  |
| 5. F1_25-41            | 17             | TASTTATATLVEPARIT  |
| 6. F1_31-47            | 17             | TATLVEPARITLTYKEG  |
| 7. F1_37-53            | 17             | PARITLTYKEGAPITIM  |
| 8. F1_43-59            | 17             | TYKEGAPITIMDNGNID  |
| 9. F1_49-65            | 17             | PITIMDNGNIDTELLVG  |
| 10. F1_55-71           | 17             | NGNIDTELLVGTLTLGG  |
| 11. F1_61-77           | 17             | ELLVGTLTLGGYKTGTT  |
| 12. F1_67-83           | 17             | LTLLGGYKTGTTSTSVNF |
| 13. F1_73-89           | 17             | KTGTTSTSVNFTDAAGD  |
| 14. F1_79-95           | 17             | TSVNFTDAAGDPMYLT   |
| 15. F1_85-101          | 17             | DAAGDPMYLTFTSQDGN  |
| 16. F1_91-107          | 17             | MYLTFTSQDGNNHQFTT  |
| 17. F1_97-113          | 17             | SQDGNNHQFTTKVIGKD  |
| 18. F1_103-119         | 17             | HQFTTKVIGKDSRDFDI  |
| 19. F1_109-125         | 17             | VIGKDSRDFDISPKVNG  |
| 20. F1_115-131         | 17             | RDFDISPKVNGENLVGD  |
| 21. F1_121-137         | 17             | PKVNGENLVGDDVVLAT  |
| 22. F1_127-143         | 17             | NLVGDDVVLATGSQDFF  |
| 23. F1_133-149         | 17             | VVLATGSQDFFVRSIGS  |
| 24. F1_139-155         | 17             | SQDFFVRSIGSKGGKLA  |
| 25. F1_145-161         | 17             | RSIGSKGGKLAAGKYTD  |
| 26. F1_151-167         | 17             | GGKLAAGKYTDAVTVT   |
| 27. F1_157-170         | 14             | GKYTDAVTVTVSNQ     |

**Table S2.** Human antibody response measured by ELISA to F1 and LcrV in vaccinated and unvaccinated groups.

| Antigen | Parameter                        | Donor's group          |                        |                        |                        |
|---------|----------------------------------|------------------------|------------------------|------------------------|------------------------|
|         |                                  | A-Total                | A-RV                   | A-EV                   | B                      |
| F1      | GMT (95% CI)                     | 76,10<br>(46,73-123,9) | 100,0<br>(45,62-219,2) | 62,23<br>(31,89-121,5) | 33,86<br>(25,07-45,73) |
|         | Reciprocal titers,<br>Min to Max | 50-1600                | 50-800                 | 100-1600               | 50-100                 |
| LcrV    | GMT (95% CI)                     | 29,09<br>(23,41-36,16) | 25,00<br>(25,00-25,00) | 32,73<br>(22,06-48,57) | 25,00<br>(25,00-25,00) |
|         | Reciprocal titers,<br>Min to Max | 200-400                | -                      | 200-400                | -                      |

<sup>1</sup> A-Total – all donors vaccinated with LPV, A-RV – recently vaccinated, A-EV – early vaccinated, B – naïve unvaccinated volunteers; GMT - geometric mean titers, CI – confidence interval, Min to Max – minimum to maximum, reciprocal titer limits. For GMT calculation titers below the limit of detection (< 50) were arbitrarily assigned a value of 25.
